## CORRESPONDENCE

Anesthesiology  
1996; 84:1258  
© 1996 American Society of Anesthesiologists, Inc.  
Lippincott-Raven Publishers

### Forget the Costs: Use What Is Best

*To the Editor:*—Anesthesiology is reaching a new low when we worry about and calculate cost per minute of anesthesia time; particularly because the difference is pennies per minute. The cost analysis by Macario *et al.*<sup>1</sup> compares the cost of different methods of airway management—mask, laryngeal mask, and endotracheal tube—and drug costs with each. The assumption is such that, with a mask, gas flows of 6 l/min must be used. The authors seem unaware of the fact that it is possible (and was standard practice) to use even a closed system with a mask. Flow rates of 300–400 ml/min were customary. I am sure that low flows would have a major impact on the calculations and would make the mask method best by far. It should come as no surprise to anyone that reused items are less costly than disposables.

What troubles me is that what is best for the patient is not even considered. Is inconvenience for the anesthesiologist more important?

I have yet to see surgeons calculating the cost per stitch for suture materials, swaged-on needles, disposable *versus* reusable sponges, drapes, and other items. Expensive high-technology surgery is acceptable and sought. It is demeaning for the anesthesiologist and a disservice to patients that we should consider pennies per minute to be important.

Anesthesiology  
1996; 84:1258–9  
© 1996 American Society of Anesthesiologists, Inc.  
Lippincott-Raven Publishers

*In Reply:*—Our economic analysis of the laryngeal mask airway for outpatient elective surgery provides a model to identify the variables that have the greatest effect on cost-efficiency when determining airway management choice.<sup>1</sup> Jacoby raises several important points. The first is that intraoperative anesthesia costs (*i.e.*, cost per minute of anesthesia) are a small portion (5.6%) of the overall costs related to perioperative care of a surgical patient.<sup>2</sup> Although the cost per case of anesthesia drugs and supplies is small, given the large number of anesthetics administered, small savings per case can represent substantial savings when aggregated. By taking a leadership role in analyses of operating room economics, we will be better able to work with our surgical and nursing colleagues to improve the fiscal profile of surgical care.

In a capitated reimbursement environment, where a healthcare

When I have my operation, I want what is best for me, not what is cheapest and most convenient for the anesthesiologist.  
Primum non nocere.

Jay Jacoby, M.D., Ph.D.  
Professor  
Department of Anesthesiology  
The Ohio State University Medical Center  
410 West 10th Avenue  
Columbus, Ohio 43210-1228

### Reference

1. Macario A, Chang P, Stempel D, Brock-Utne J: A cost analysis of the laryngeal mask airway for adult elective outpatient surgery. *ANESTHESIOLOGY* 1995; 83:250–7

(Accepted for publication January 24, 1996.)

system is paid a fixed amount of money per month to care for a predefined number of covered lives, anesthesiologists need to continually determine how to achieve the best outcomes at the lowest reasonable cost, even if the marginal cost difference between anesthetics is low. Quantitatively defining what is best for the patient can be difficult. In our cost analysis, we placed value on what is best for the patient by factoring in the cost of various complications (*i.e.*, risk of dental injury). We also state that delivering high-quality anesthesia care requires that specific patient preferences regarding airway choice be incorporated into the airway management decision.

We assumed the fresh gas flow used for a face-mask anesthetic (6 l/min in our baseline case) to be greater than the fresh gas flow used for the laryngeal mask airway or the tracheal tube. Certainly, if the flow rates used for the face masks are decreased to 400 ml/min, the

face mask becomes a  
choice for elective o

Anesthesiology  
1996; 84:1259–60  
© 1996 American Society  
Lippincott-Raven Publishers

*To the Editor:*—  
viously unrecognized  
for elective ambula  
mined by urinary o  
no assay. Although t  
for the clinician to  
pregnancy test resu

The probability o  
(positive predictive  
vided by the total  
tives); the probabi  
test result (negativ  
negatives divided b  
+ false negatives).  
therefore given by  
values. These valu  
the test (sensitivit  
pregnancy in the p

Manley *et al.*<sup>1</sup> qu  
adolescent women  
Malviya *et al.*<sup>2</sup> The  
of 179, 99.4%. Ma  
negative result (pre  
remote." Let us as  
100% (a sensitivit  
the following disc
